# Supplementary material for: Outcomes of Non-curative Gastrectomy for Gastric Cancer: An Analysis of the American College of Surgeons National Surgical Quality Improvement Program (ACS-NSQIP)
Source: Springer Nature journal article supplement (doi:10.1245/s10434-018-6824-8), 2018-10-08
Supplement: MOESM1 [file 16182750]

<TC>**TABLE S1** Coding strategy for surgical procedures

| Surgical procedure | Common Procedure Terminology (CPT) code |
| --- | --- |
| Total gastrectomy | 43620  43621  43622 |
| Subtotal gastrectomy | 43631  43632  43633  43634 |
| Multivisceral resection | Any of the following |
| Splenectomy | 38120  38102  38129 |
| Colectomy | 44140  44141  44160 |
| Pancreatectomy | 48146  48145  48140 |
| Enterectomy | 44121  44120  44125 |
| Hepatectomy | 47100  47120  47122 |
| Esophagectomy | 43124  43117  43118  43101  43121  43122  43123 |
